# Supplementary material for: Structure in the variability of the basic reproductive number (R0) for Zika epidemics in the Pacific islands
Source: eLife journal article supplement (doi:10.7554/elife.19874), 2016-11-29
Supplement: supp [file elife-19874-supp-v1.zip]

# Structure in the variability of $R_0$ for Zika epidemics in the Pacific islands

C Champagne, DG Salthouse, R Paul, VM Cao-Lormeau, B Roche, B Cazelles

## Using SSM software to reproduce the calculations

- 1.** Install SSM software on your machine as indicated in <https://github.com/JDureau/ssm>  
The complementary module “SSM predict” also needs to be installed (<https://github.com/sballesteros/ssm-predict>)

- 2.** In order to run one model, four elements are needed:
  - a. Data files in csv format
  - b. Priors distributions in json format
  - c. An initialisation file in json format
  - d. The json file containing the model, called “ssm.json”

These 4 elements are provided for each model, in a file with the corresponding names. The initialisation file provided here is the result of a previous simplex run (called `theta_simplex.json`) but one can start with other initial values (also put in a file named `theta_simplex.json` for using with the given code).

- 3.** Execute the R code “`pmcmc_kmcmc_simulations.R`”.  
This file enables to compile the model, run KMCMC and PMCMC algorithm and do a simulation of the model (using our estimated values).

The PMCMC part is to be used when convergence is reached with KMCMC algorithm, which might sometimes require more than 5 KMCMC steps.

The PMCMC part is computationally intensive and may require a cluster (when the number of particles is 10,000).

We provided our estimates for Pandey model in Tahiti as an example, in the “`pmcmc-result`” file: they comprise the last PMCMC chain (`trace_0.csv`), the filter trajectory (`X_0.csv`), the last set of parameters of the chain (`mle.json`) and the simulation of the model (`X_simul.csv`)

- 4.** All the calculation is done, and the outputs can be plotted using for example the R code “`plotting`”.
