# Supplementary figures and images for: Structure in the variability of the basic reproductive number (R0) for Zika epidemics in the Pacific islands
Source: eLife journal article supplement (doi:10.7554/elife.19874), 2016-11-29

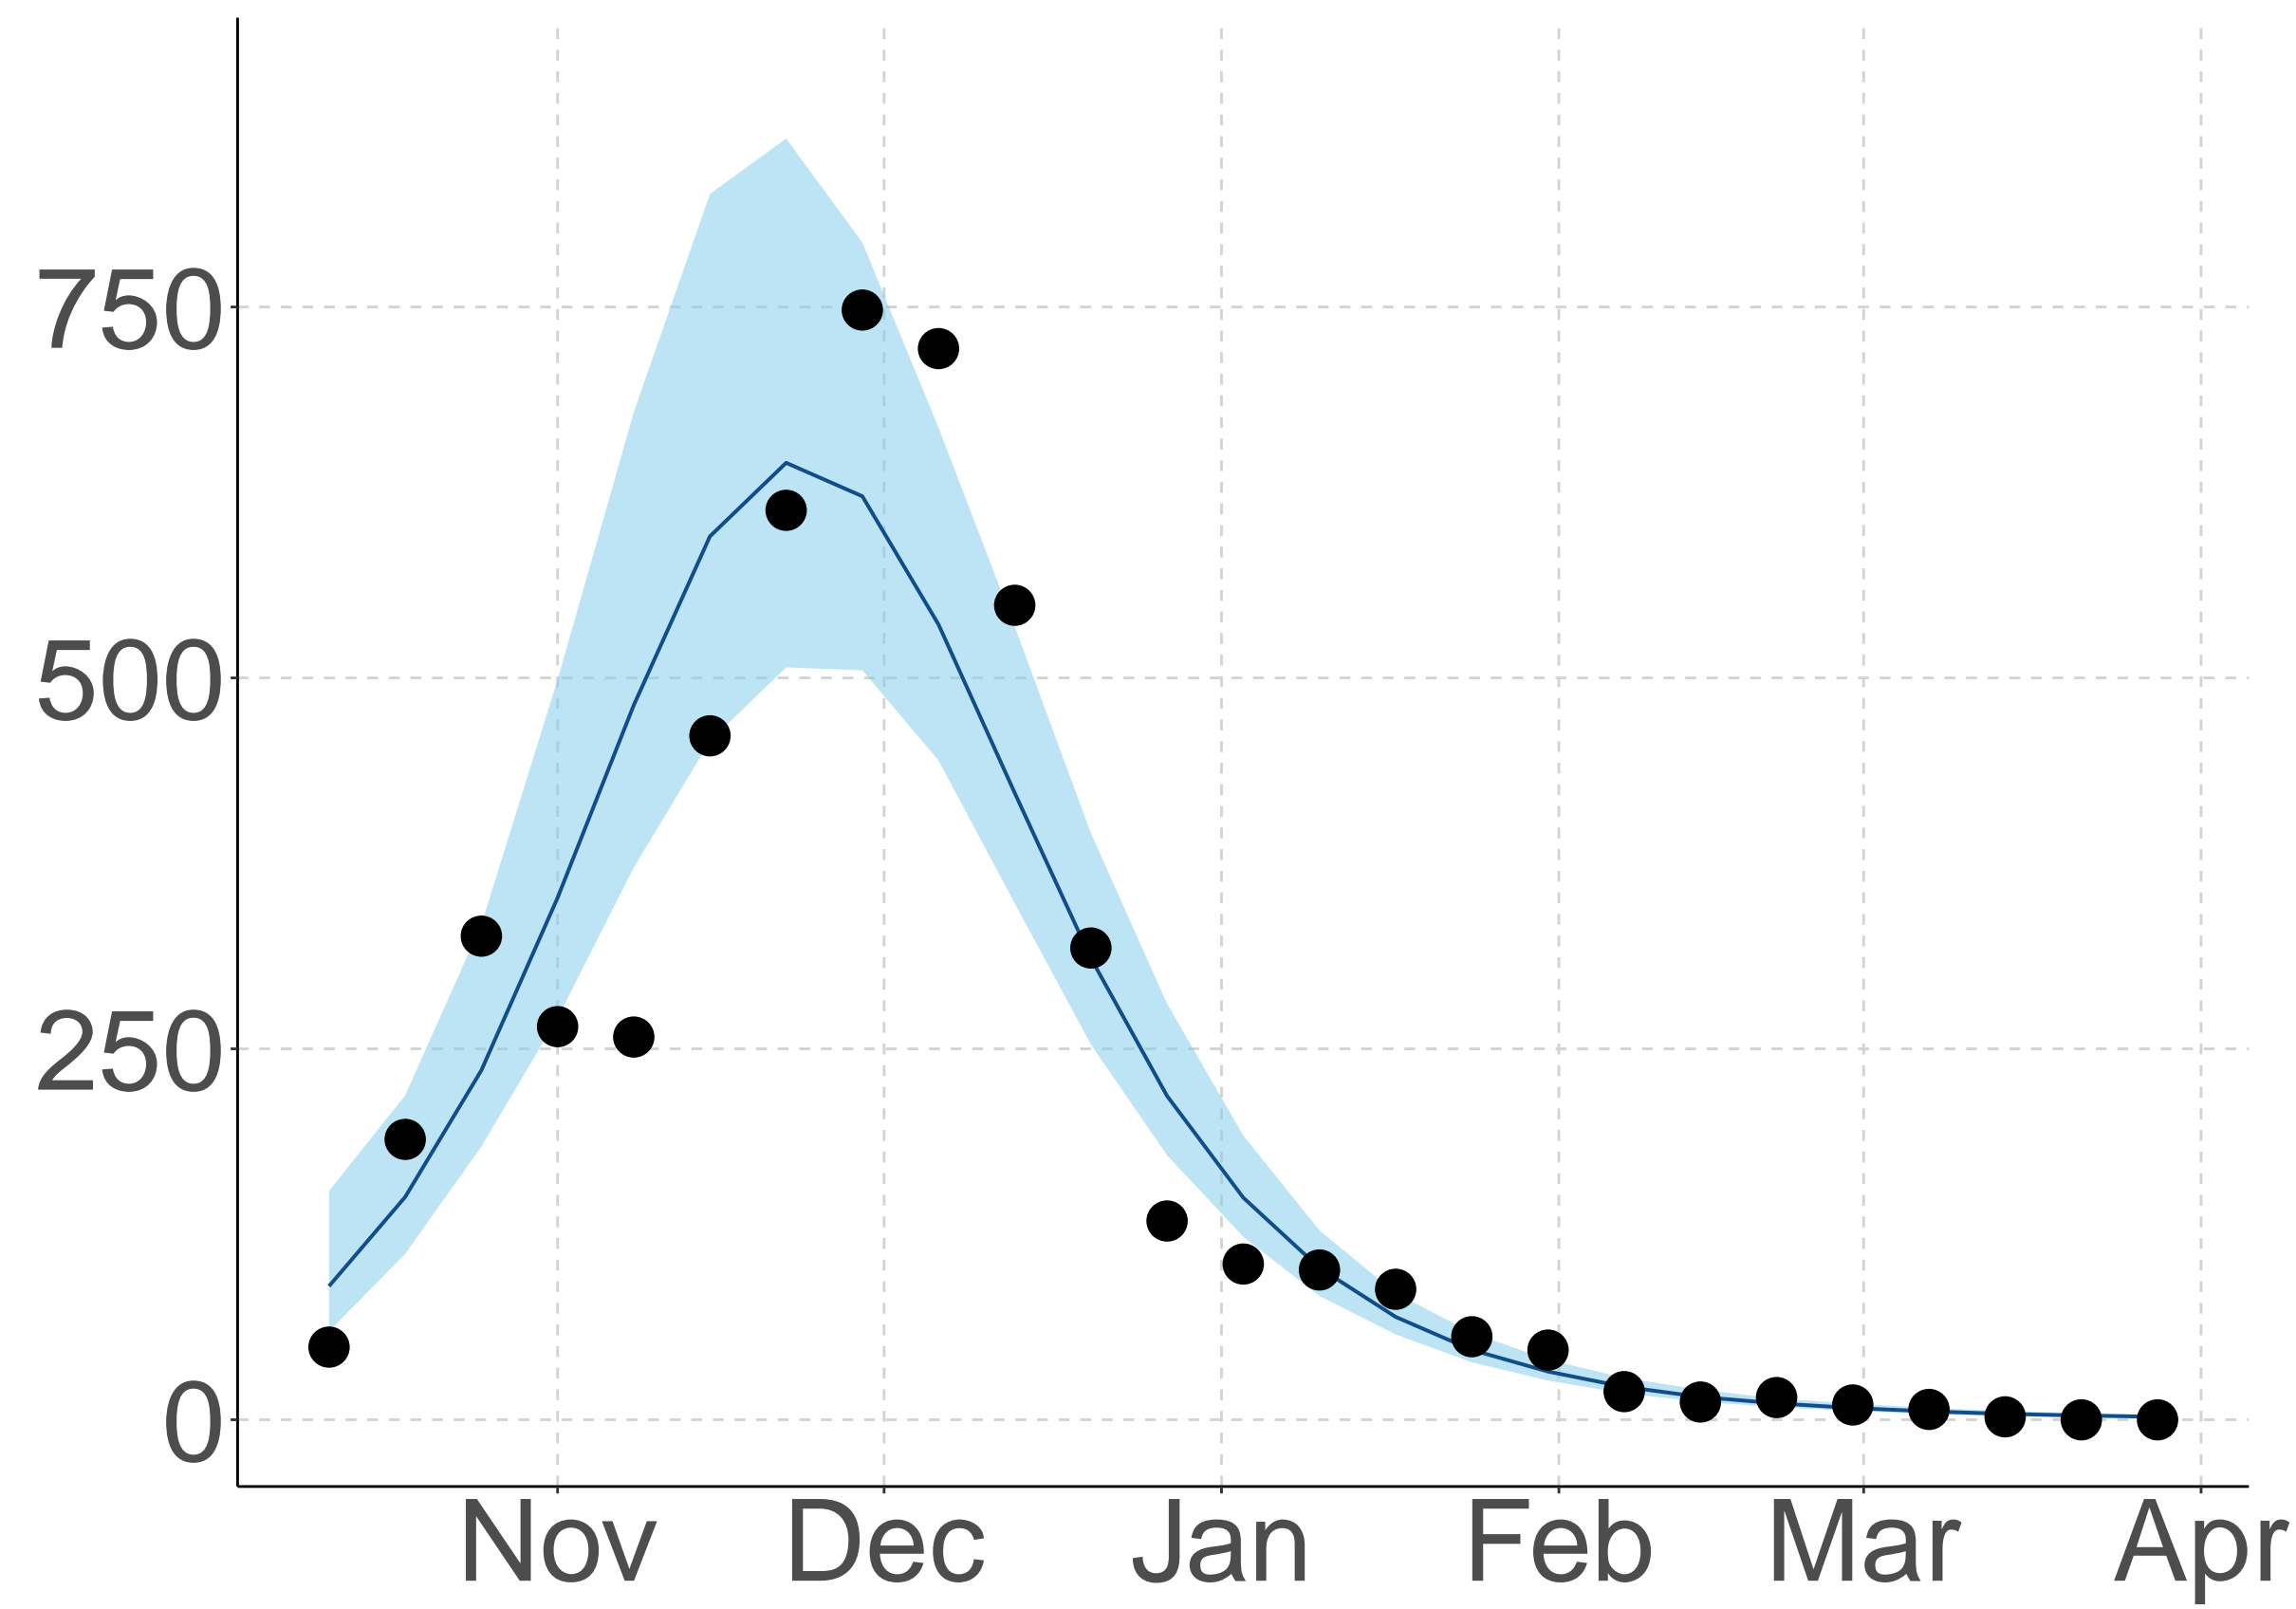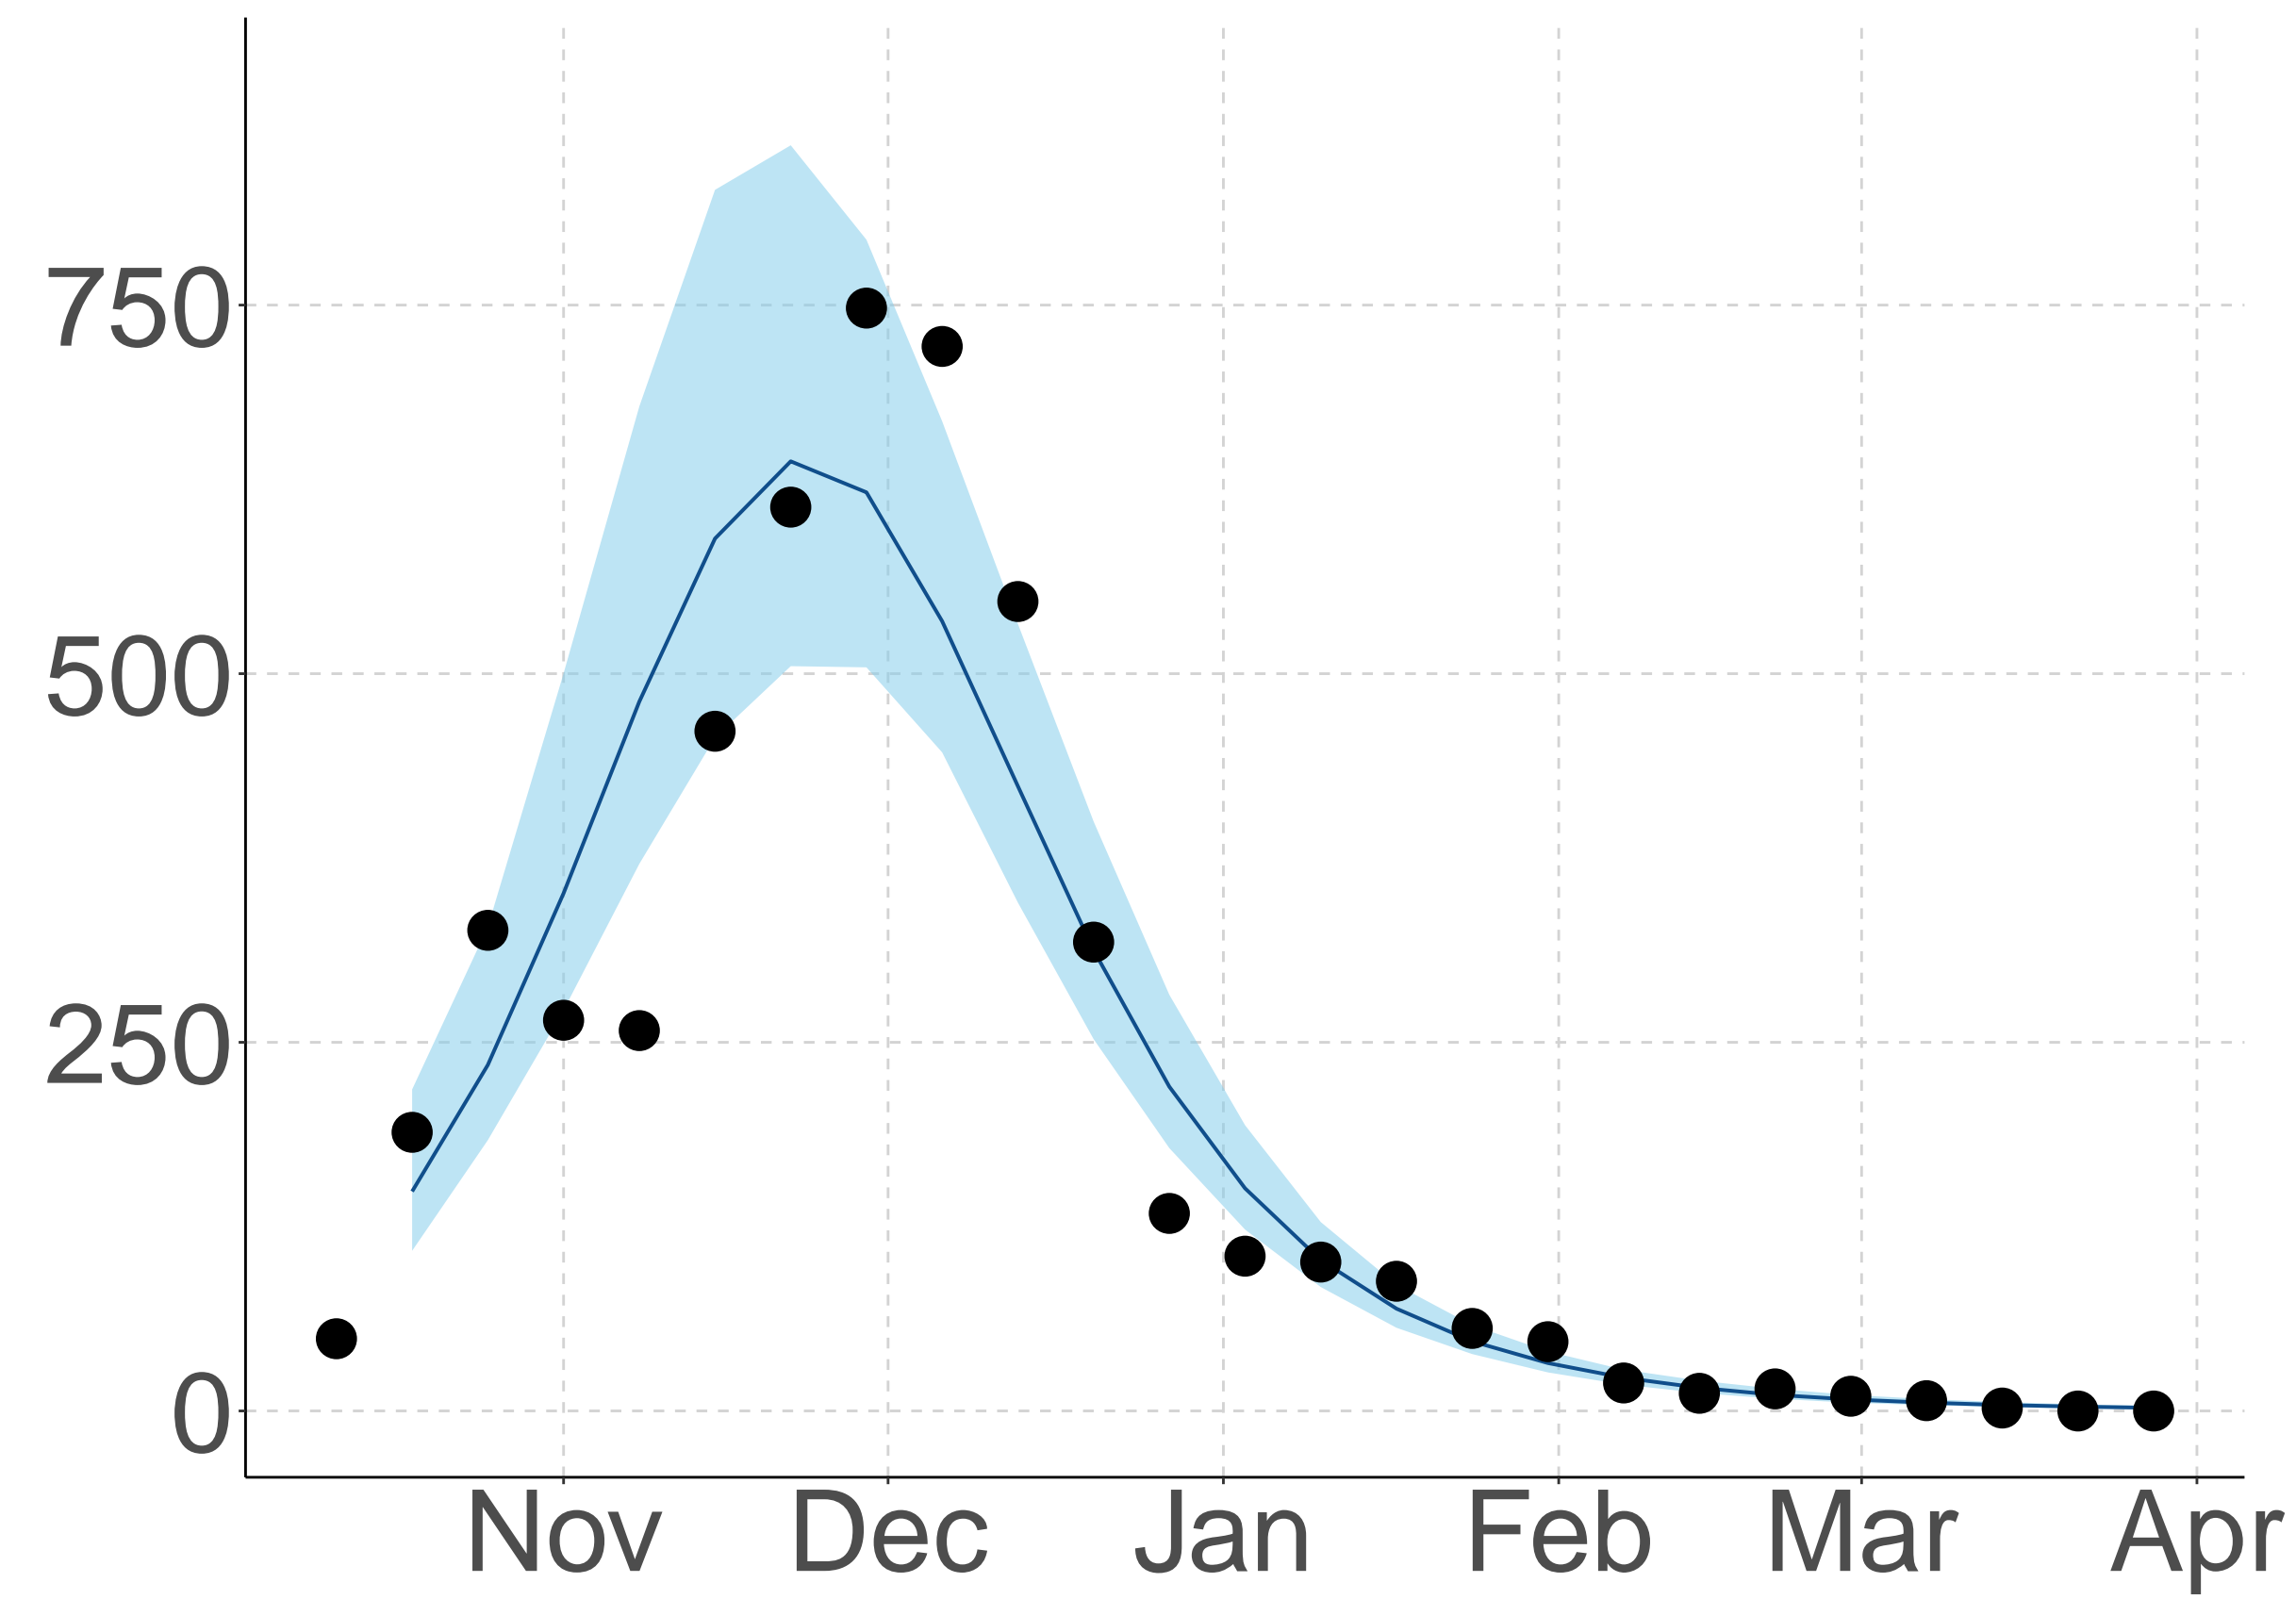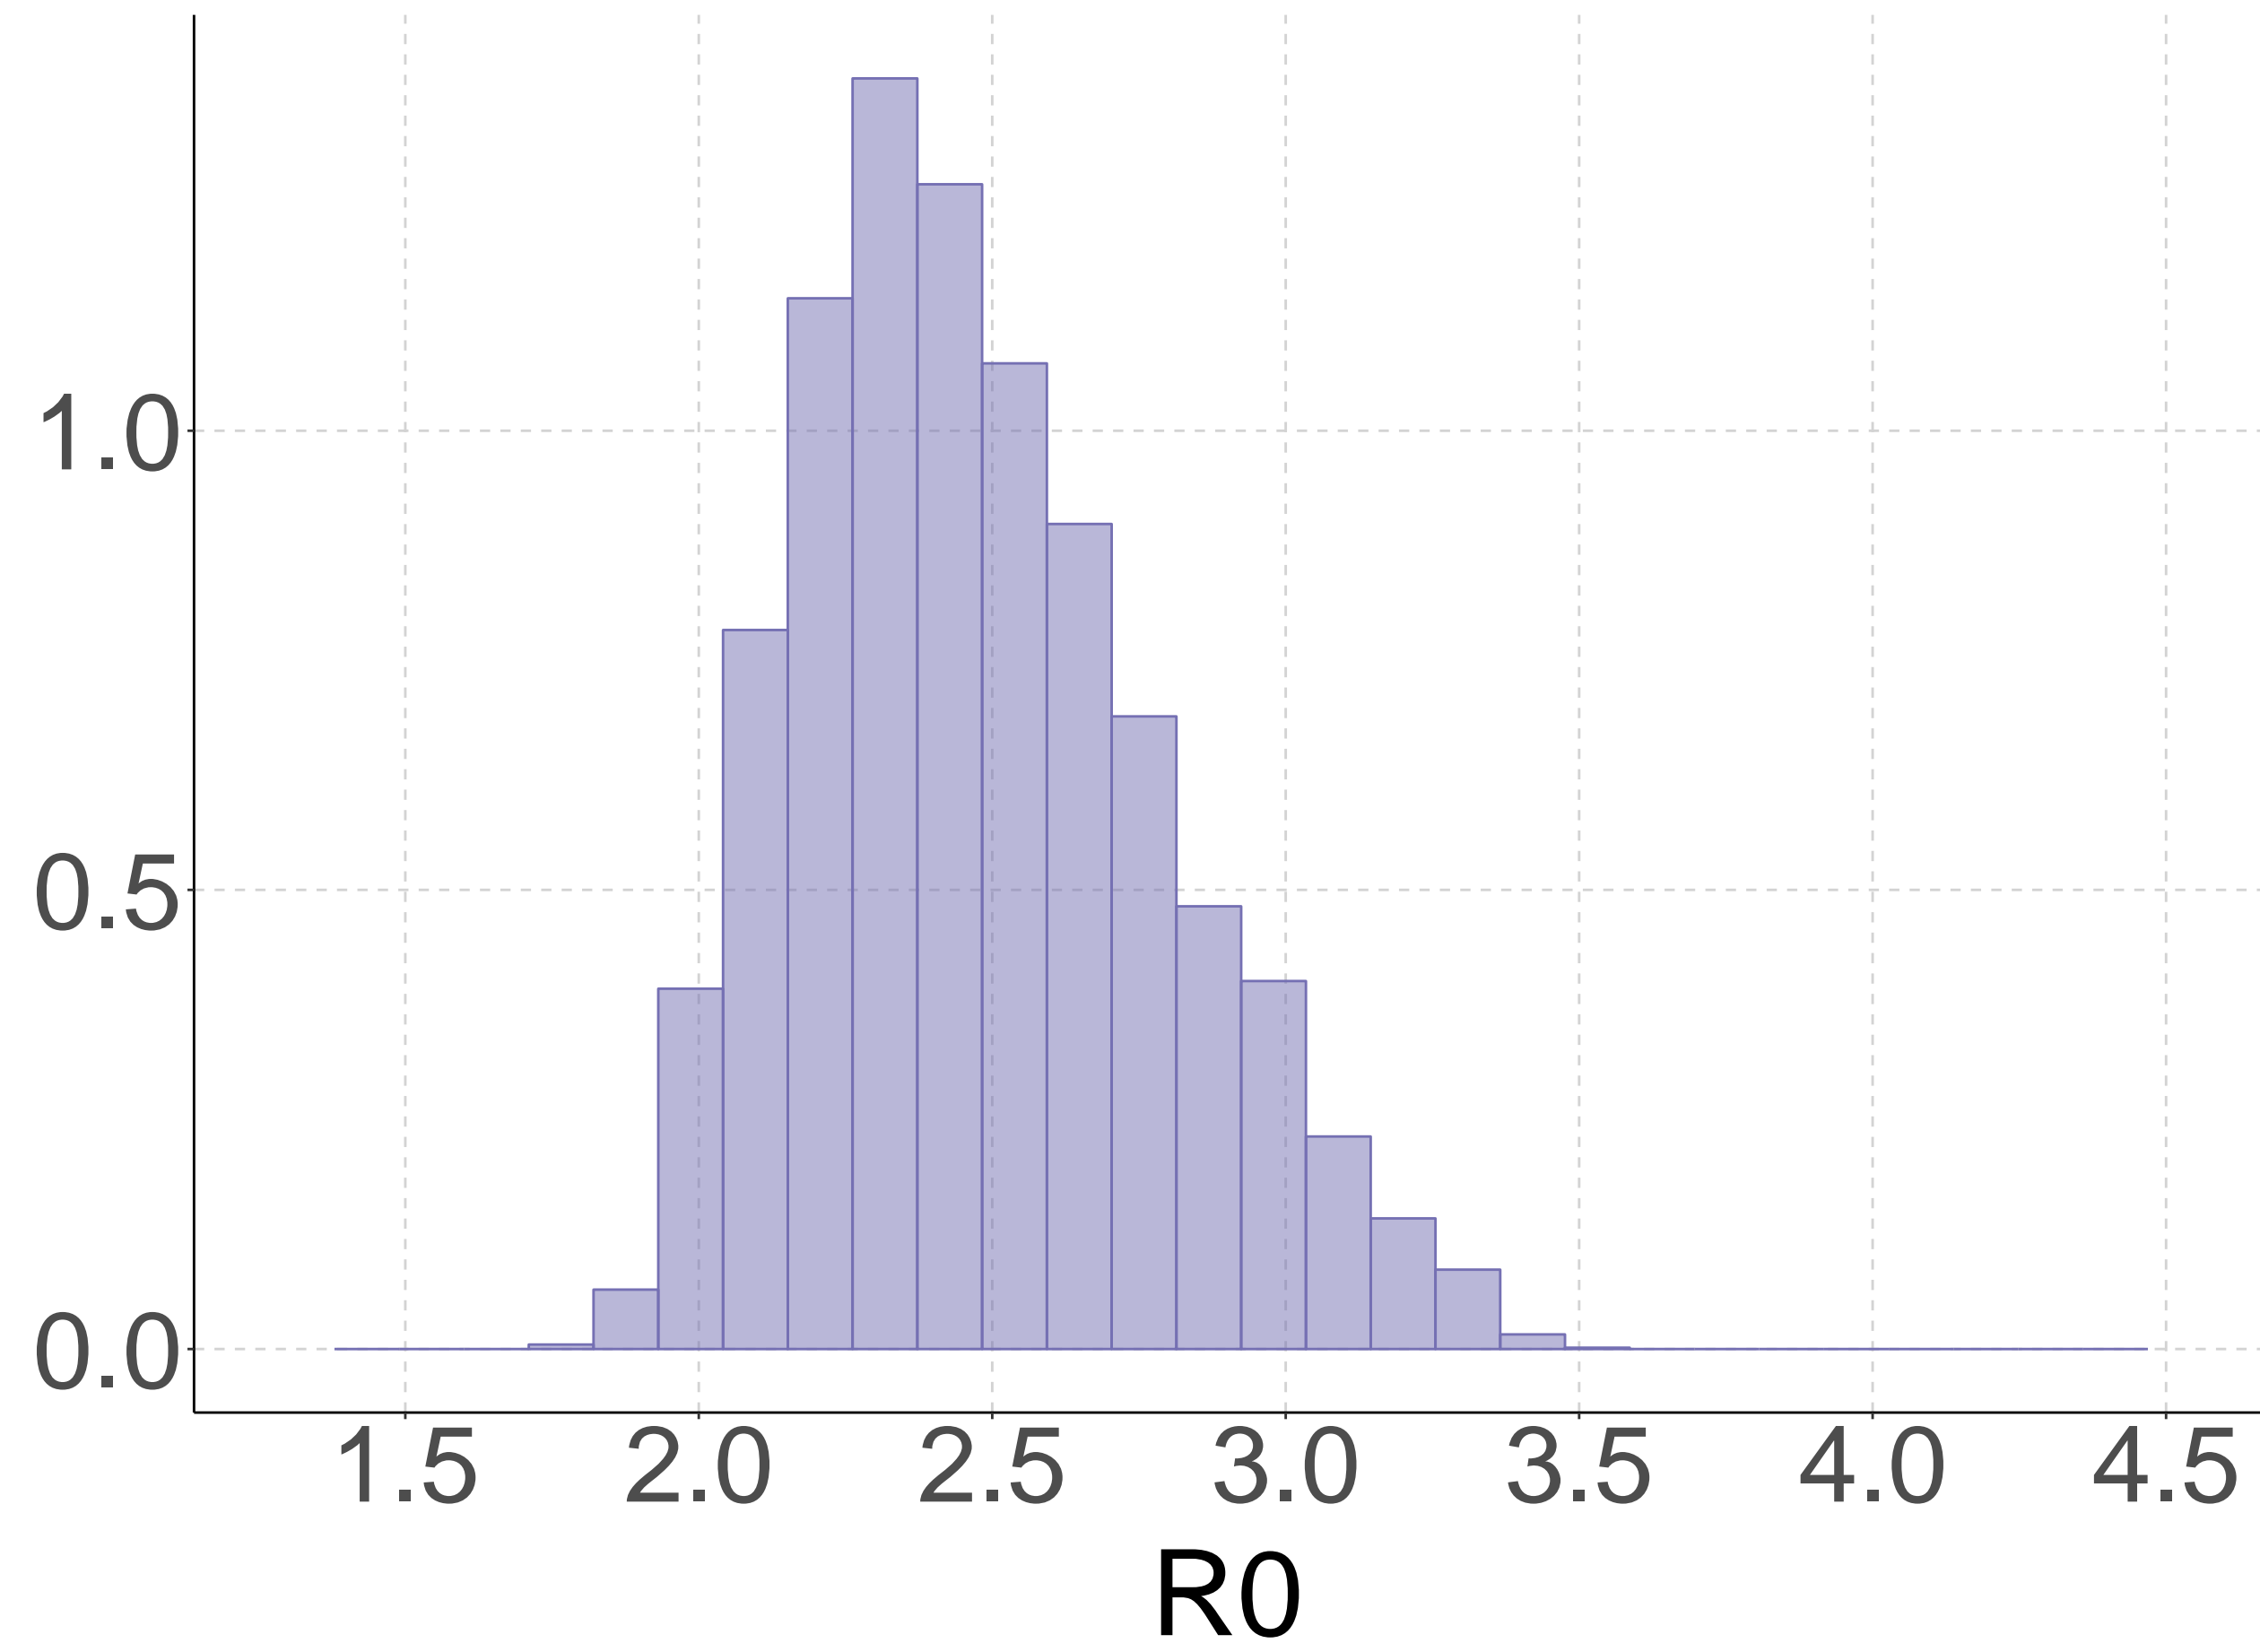

Supplement: supp [file elife-19874-supp-v1.zip]
